# Supplementary material for: Multimodal Tracking of Hematopoietic Stem Cells from Young and Old Mice Labeled with Magnetic–Fluorescent Nanoparticles and Their Grafting by Bioluminescence in a Bone Marrow Transplant Model
Source: MDPI journal article supplement (doi:10.3390/biomedicines9070752), 2021-06-29
Supplement: s1 [file s1]

## Supplementary Materials

**Table S1.** ANOVA of the BLI intensity of BM-MNC from young and old mice labeled with different concentrations of SPION<sub>NIRF-Rh</sub>.

| Variation source | Sum of squares        | Degrees of freedom | Mean square           | F     | p       |
|------------------|-----------------------|--------------------|-----------------------|-------|---------|
| Applications     | 1.32x10 <sup>14</sup> | 7                  | 1.88x10 <sup>13</sup> | 24.10 | < 0.001 |
| Residual         | 2.50x10 <sup>13</sup> | 32                 | 7.81x10 <sup>11</sup> |       |         |

SPION<sub>NIRF-Rh</sub>: multimodal nanoparticles; BM-MNC: bone marrow mononuclear cells; BLI: Bioluminescence.

**Table S2.** Post Hoc test of the BLI intensity of BM-MNC from young and old mice labeled with different concentrations of SPION<sub>NIRF-Rh</sub>.

| Groups     |            | Mean difference       | 95% CI               |             | P       |
|------------|------------|-----------------------|----------------------|-------------|---------|
|            |            |                       | Lower Bound          | Upper Bound |         |
| ctrl_young | ctrl_old   | 8.66x10 <sup>5</sup>  | 5.59x10 <sup>5</sup> | 1.55        | 1       |
|            | c10_young  | 1.77x10 <sup>6</sup>  | 5.59x10 <sup>5</sup> | 3.17        | 0.094   |
|            | c10_old    | 2.28x10 <sup>6</sup>  | 5.59x10 <sup>5</sup> | 4.09        | 0.008   |
|            | c30_young  | 3.48x10 <sup>6</sup>  | 5.59x10 <sup>5</sup> | 6.22        | < 0.001 |
|            | c30_old    | 4.13x10 <sup>6</sup>  | 5.59x10 <sup>5</sup> | 7.39        | < 0.001 |
|            | c50_young  | 5.21x10 <sup>6</sup>  | 5.59x10 <sup>5</sup> | 9.32        | < 0.001 |
|            | c50_old    | 5.13x10 <sup>6</sup>  | 5.59x10 <sup>5</sup> | 9.18        | < 0.001 |
| ctrl_old   | c10_young  | 9.06x10 <sup>5</sup>  | 5.59x10 <sup>5</sup> | 1.62        | 1       |
|            | c10_old    | 1.42x10 <sup>6</sup>  | 5.59x10 <sup>5</sup> | 2.54        | 0.454   |
|            | c30_young  | 2.61x10 <sup>6</sup>  | 5.59x10 <sup>5</sup> | 4.68        | 0.001   |
|            | c30_old    | 3.27x10 <sup>6</sup>  | 5.59x10 <sup>5</sup> | 5.84        | < 0.001 |
|            | c50_young  | 4.34x10 <sup>6</sup>  | 5.59x10 <sup>5</sup> | 7.77        | < 0.001 |
|            | c50_old    | 4.27x10 <sup>6</sup>  | 5.59x10 <sup>5</sup> | 7.63        | < 0.001 |
| c10_young  | c10_old    | 5.12x10 <sup>5</sup>  | 5.59x10 <sup>5</sup> | 0.92        | 1       |
|            | c30_young  | 1.70x10 <sup>6</sup>  | 5.59x10 <sup>5</sup> | 3.05        | 0.127   |
|            | c30_old    | 2.36x10 <sup>6</sup>  | 5.59x10 <sup>5</sup> | 4.30        | 0.005   |
|            | c50_young  | 3.44x10 <sup>6</sup>  | 5.59x10 <sup>5</sup> | 6.15        | < 0.001 |
|            | c50_old    | 3.36x10 <sup>6</sup>  | 5.59x10 <sup>5</sup> | 6.01        | < 0.001 |
| c10_old    | c30_young  | 1.19x10 <sup>6</sup>  | 5.59x10 <sup>5</sup> | 2.14        | 1       |
|            | c30_old    | 1.85x10 <sup>6</sup>  | 5.59x10 <sup>5</sup> | 3.30        | 0.066   |
|            | c50_jovens | 2.92x10 <sup>6</sup>  | 5.59x10 <sup>5</sup> | 5.23        | < 0.001 |
|            | c50_old    | 2.85x10 <sup>6</sup>  | 5.59x10 <sup>5</sup> | 5.09        | < 0.001 |
| c30_young  | c30_old    | 6.52x10 <sup>5</sup>  | 5.59x10 <sup>5</sup> | 1.17        | 1       |
|            | c50_young  | 1.73x10 <sup>6</sup>  | 5.59x10 <sup>5</sup> | 3.10        | 0.114   |
|            | c50_old    | 1.65x10 <sup>6</sup>  | 5.59x10 <sup>5</sup> | 2.96        | 0.162   |
| c30_old    | c50_young  | 1.08x10 <sup>6</sup>  | 5.59x10 <sup>5</sup> | 1.93        | 1       |
|            | c50_old    | 1.00x10 <sup>6</sup>  | 5.59x10 <sup>5</sup> | 1.80        | 1       |
| c50_young  | c50_old    | -7.76x10 <sup>5</sup> | 5.59x10 <sup>5</sup> | -0.14       | 1       |

SPION<sub>NIRF-Rh</sub>: multimodal nanoparticles; BM-MNC: bone marrow mononuclear cells; BLI: Bioluminescence; ctrl: Control; c10: concentration of 10 µg Fe/mL of SPION<sub>NIRF-Rh</sub>; c30: concentration of 30 µg Fe/mL of SPION<sub>NIRF-Rh</sub>; c50: concentration of 50 µg Fe/mL of SPION<sub>NIRF-Rh</sub>; CI: confidence interval.

**Table S3.** ANOVA test of the NIRF intensity of BM-MNC from young and old animals labeled with 10, 30, and 50 µg Fe/mL of SPION<sub>NIRF-Rh</sub>.

| Variation source | Sum of squares        | Degrees of freedom | Mean square           | F      | p       |
|------------------|-----------------------|--------------------|-----------------------|--------|---------|
| Applications     | 3.82x10 <sup>17</sup> | 5                  | 7.64X10 <sup>16</sup> | 132.20 | < 0.001 |
| Residual         | 1.39x10 <sup>16</sup> | 24                 | 5.78x10 <sup>14</sup> |        |         |

SPION<sub>NIRF-Rh</sub>: multimodal nanoparticles; BM-MNC: bone marrow mononuclear cells; NIRF: Near-infrared fluorescence.

**Table S4.** Post Hoc test of the NIRF intensity of BM-MNC from young and old animals labeled with 10, 30, and 50 µg Fe/mL of SPION<sub>NIRF-Rh</sub>.

| Group     |           | Mean difference        | 95% CI               |             | 95% CI  |
|-----------|-----------|------------------------|----------------------|-------------|---------|
|           |           |                        | Lower Bound          | Upper Bound |         |
| c10_young | c10_old   | 4.54x10 <sup>7</sup>   | 1.52x10 <sup>7</sup> | 2.97        | 0.096   |
|           | c30_young | -1.30x10 <sup>8</sup>  | 1.52x10 <sup>7</sup> | -8.55       | < 0.001 |
|           | c30_old   | -1.21x10 <sup>8</sup>  | 1.52x10 <sup>7</sup> | -7.98       | < 0.001 |
|           | c50_young | -2.51x10 <sup>8</sup>  | 1.52x10 <sup>7</sup> | -16.52      | < 0.001 |
|           | c50_old   | -2.51x10 <sup>8</sup>  | 1.52x10 <sup>7</sup> | -16.56      | < 0.001 |
| c10_old   | c30_young | -1.75x10 <sup>8</sup>  | 1.52x10 <sup>7</sup> | -11.54      | < 0.001 |
|           | c30_old   | -1.66x10 <sup>8</sup>  | 1.52x10 <sup>7</sup> | -10.94      | < 0.001 |
|           | c50_young | -2.97x10 <sup>8</sup>  | 1.52x10 <sup>7</sup> | -19.51      | < 0.001 |
|           | c50_old   | -2.97x10 <sup>8</sup>  | 1.52x10 <sup>7</sup> | -19.55      | < 0.001 |
| c30_young | c30_old   | 9.00x10 <sup>6</sup>   | 1.52x10 <sup>7</sup> | 0.59        | 1       |
|           | c50_young | -1.21x10 <sup>8</sup>  | 1.52x10 <sup>7</sup> | -7.97       | < 0.001 |
|           | c50_old   | -1.21x10 <sup>8</sup>  | 1.52x10 <sup>7</sup> | -8.01       | < 0.001 |
| c30_old   | c50_young | -1.30x10 <sup>8</sup>  | 1.52x10 <sup>7</sup> | -8.56       | < 0.001 |
|           | c50_old   | -1.31x10 <sup>8</sup>  | 1.52x10 <sup>7</sup> | -8.60       | < 0.001 |
| c50_young | c50_old   | -6.00 x10 <sup>6</sup> | 1.52x10 <sup>7</sup> | -0.04       | 1       |

SPION<sub>NIRF-Rh</sub>: multimodal nanoparticles; BM-MNC: bone marrow mononuclear cells; NIRF: Near-infrared fluorescence; c10: concentration of 10 µg Fe/mL of SPION<sub>NIRF-Rh</sub>; c30: concentration of 30 µg Fe/mL of SPION<sub>NIRF-Rh</sub>; c50: concentration of 50 µg Fe/mL of SPION<sub>NIRF-Rh</sub>; CI: confidence interval.

**Table S5.** ANOVA of the iron quantification internalized into BM-MNC from young and old animals labeled with 10, 30, and 50 µg Fe/mL of SPION<sub>NIRF-Rh</sub> by ICP-MS.

|                                        | Variation source | Sum of squares       | Degrees of freedom | Mean square          | F      | p       |
|----------------------------------------|------------------|----------------------|--------------------|----------------------|--------|---------|
| pg Fe/BM-MNC                           | Applications     | 27.73                | 5                  | 5.55                 | 790.89 | < 0.001 |
|                                        | Residual         | 0.17                 | 24                 | 0.01                 |        |         |
| n° de SPION <sub>NIRF-Rh</sub> /BM-MNC | Applications     | 4.36x10 <sup>9</sup> | 5                  | 8.75x10 <sup>8</sup> | 810.15 | < 0.001 |
|                                        | Residual         | 2.59x10 <sup>7</sup> | 24                 | 1.08x10 <sup>6</sup> |        |         |

SPION<sub>NIRF-Rh</sub>: multimodal nanoparticles; BM-MNC: bone marrow mononuclear cells; ICP-MS: Inductively Coupled Plasma Mass Spectrometry.

**Table S6.** Post Hoc test of the iron quantification internalized into BM-MNC from young and old animals labeled with 10, 30, and 50 µg Fe/mL of SPION<sub>NIRF-Rh</sub> by ICP-MS.

| Group | Mean difference | Std. error | t | p |
|-------|-----------------|------------|---|---|
|-------|-----------------|------------|---|---|

|           |           |       |      |        |        |
|-----------|-----------|-------|------|--------|--------|
| c10_young | c10_old   | 0.23  | 0.05 | 4.277  | 0.003  |
|           | c30_young | -1.31 | 0.05 | -24.73 | < .001 |
|           | c30_old   | -1.11 | 0.05 | -20.95 | < .001 |
|           | c50_young | -2.33 | 0.05 | -44.07 | < .001 |
|           | c50_old   | -2.10 | 0.05 | -39.75 | < .001 |
| c10_old   | c30_young | -1.54 | 0.05 | -29.00 | < .001 |
|           | c30_old   | -1.34 | 0.05 | -25.22 | < .001 |
|           | c50_young | -2.56 | 0.05 | -48.33 | < .001 |
|           | c50_old   | -2.33 | 0.05 | -44.02 | < .001 |
| c30_young | c30_old   | 0.20  | 0.05 | 3.77   | 0.010  |
|           | c50_young | -1.02 | 0.05 | -19.33 | < .001 |
|           | c50_old   | -0.79 | 0.05 | -15.02 | < .001 |
| c30_old   | c50_young | -1.22 | 0.05 | -23.11 | < .001 |
|           | c50_old   | -0.99 | 0.05 | -18.80 | < .001 |
| c50_young | c50_old   | 0.23  | 0.05 | 4.31   | 0.003  |

SPION<sub>NIRF-Rh</sub>: multimodal nanoparticles; BM-MNC: bone marrow mononuclear cells; ICP-MS: Inductively Coupled Plasma Mass Spectrometry; Std. error: Standard error; c10: concentration of 10 µg Fe/mL of SPION<sub>NIRF-Rh</sub>; c30: concentration of 30 µg Fe/mL of SPION<sub>NIRF-Rh</sub>; c50: concentration of 50 µg Fe/mL of SPION<sub>NIRF-Rh</sub>.

**Table S7.** ANOVA of T2 values of the MRI samples of BM-MNC labeled with SPION<sub>NIRF-Rh</sub>.

| Variation source | Sum of squares | Degrees of freedom | Mean square | F      | p       |
|------------------|----------------|--------------------|-------------|--------|---------|
| Applications     | 12354.78       | 3                  | 4118.26     | 732.52 | < 0.001 |
| Residual         | 67.47          | 12                 | 5.62        |        |         |

SPION<sub>NIRF-Rh</sub>: multimodal nanoparticles; BM-MNC: bone marrow mononuclear cells; MRI: Magnetic resonance imaging.

**Table S8.** Post Hoc test of T2 values of MRI samples of BM-MNC from young and old animals labeled with 50 µg Fe/mL of SPION<sub>NIRF-Rh</sub>.

| Group      |            | Mean difference | 95% CI      |             | 95% CI  |
|------------|------------|-----------------|-------------|-------------|---------|
|            |            |                 | Lower Bound | Upper Bound |         |
| c50_young  | ctrl_young | -55.42          | 1.68        | -33.05      | < 0.001 |
|            | ctrl_old   | -56.64          | 1.68        | -33.79      | < 0.001 |
|            | c50_old    | -0.93           | 1.68        | -0.56       | 1       |
| ctrl_young | ctrl_old   | -1.22           | 1.68        | -0.73       | 1       |
|            | c50_old    | 54.49           | 1.68        | 32.50       | < 0.001 |
| ctrl_old   | c50_old    | 55.71           | 1.68        | 33.29       | < 0.001 |

SPION<sub>NIRF-Rh</sub>: multimodal nanoparticles; BM-MNC: bone marrow mononuclear cells; MRI: Magnetic resonance imaging; ctrl: Control; c50: concentration of 50 µg Fe/mL of SPION<sub>NIRF-Rh</sub>.

**Table S9.** T test of the iron quantification internalized in BM-MNC from young and old animals labeled with SPION<sub>NIRF-Rh</sub> by MRI.

|                                        | t    | Degrees of freedom | p     |
|----------------------------------------|------|--------------------|-------|
| pg Fe/BM-MNC                           | 0.36 | 6                  | 0.764 |
| n° of SPION <sub>NIRF-Rh</sub> /BM-MNC | 0.30 | 6                  | 0.770 |

SPION<sub>NIRF-Rh</sub>: multimodal nanoparticles; BM-MNC: bone marrow mononuclear cells; MRI: Magnetic resonance imaging; ctrl: Control; c50: concentration of 50 µg Fe/mL of SPION<sub>NIRF-Rh</sub>.
